# Supplementary material
Source: MDPI journal article supplement (https://www.mdpi.com/2311-7524/9/2/234)

## Supplementary data

Figure S1: Sample chromatogram of fatty acids studied in Bartolillo (above) and Quilhuica (below)

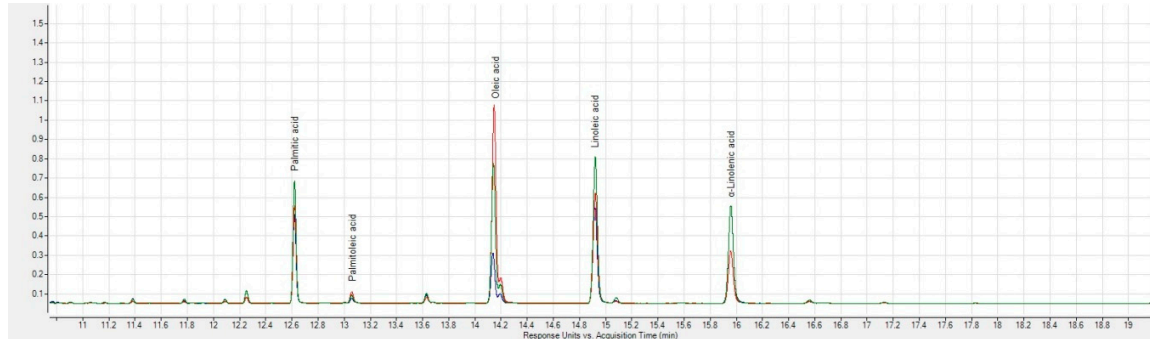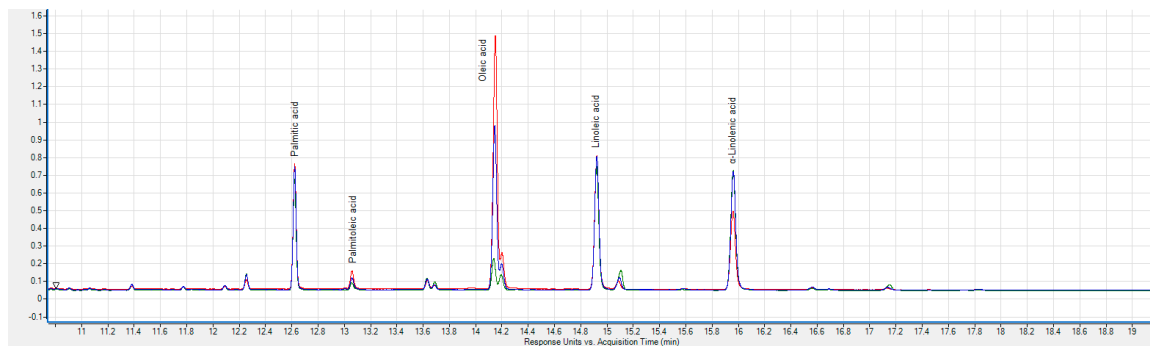

Supplement: s1 [file s1]
